# Supplementary material for: Synthesis of immobilized silver nanoparticles on ionic silicate clay and observed low-temperature melting
Source: Royal Society of Chemistry journal article supplement (doi:10.1039/b818677d), 2009-01-01
Supplement: b818677d.pdf [file b818677d.pdf]

## Supporting Information

### Synthesis of Immobilized Silver Nanoparticles on Ionic Silicate Clay and Observed Low-Temperature Melting

Rui-Xuan Dong, Chih-Cheng Chou and Jiang-Jen Lin\*

5

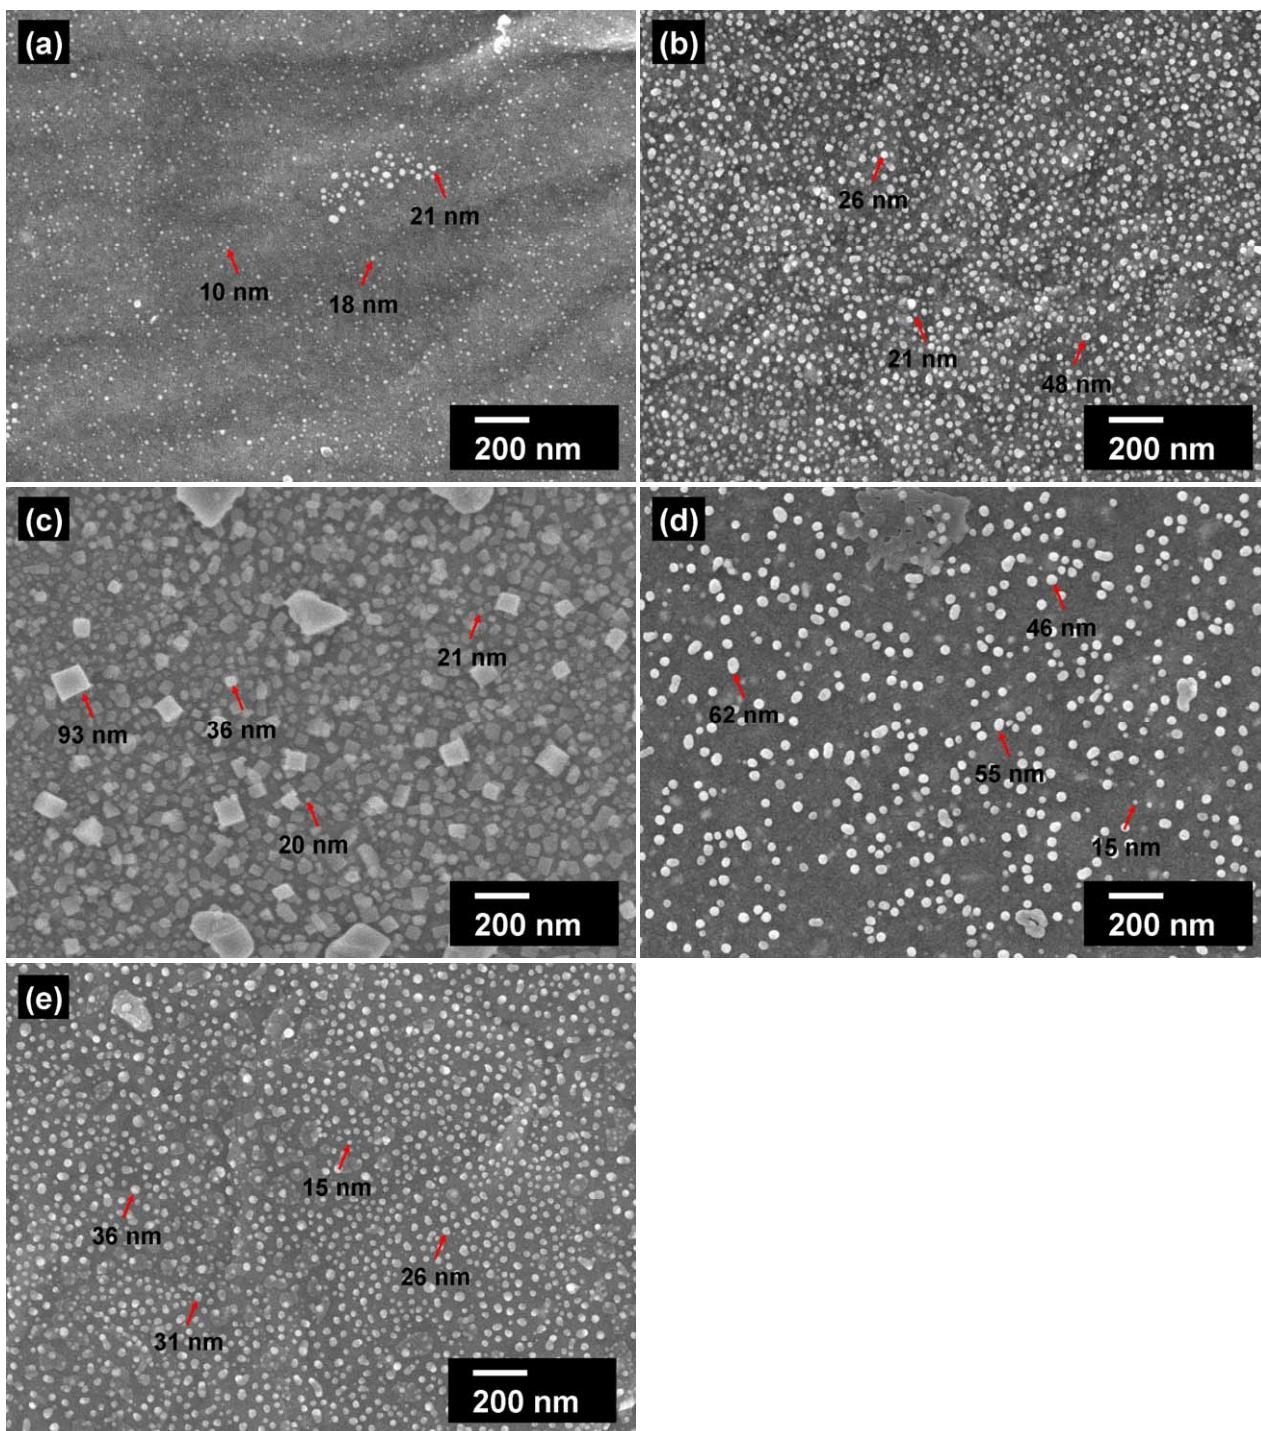

Figure S1. FE-SEM micrographs of AgNP/clay (Bentonite) at  $Ag^+/CEC$  of (a) 0.2/1.0, (b) 2.0/1.0, (c) 8.0/1.0, by methanol reduction (d) 1.0/1.0 by  $NaBH_4$  reduction, and (e) AgNP/clay (Mica) ( $Ag^+/CEC = 1.0/1.0$ ), all prepared at 80 °C and dried at 80 °C on glass. (Some representative particles with the estimated sizes are shown).

10

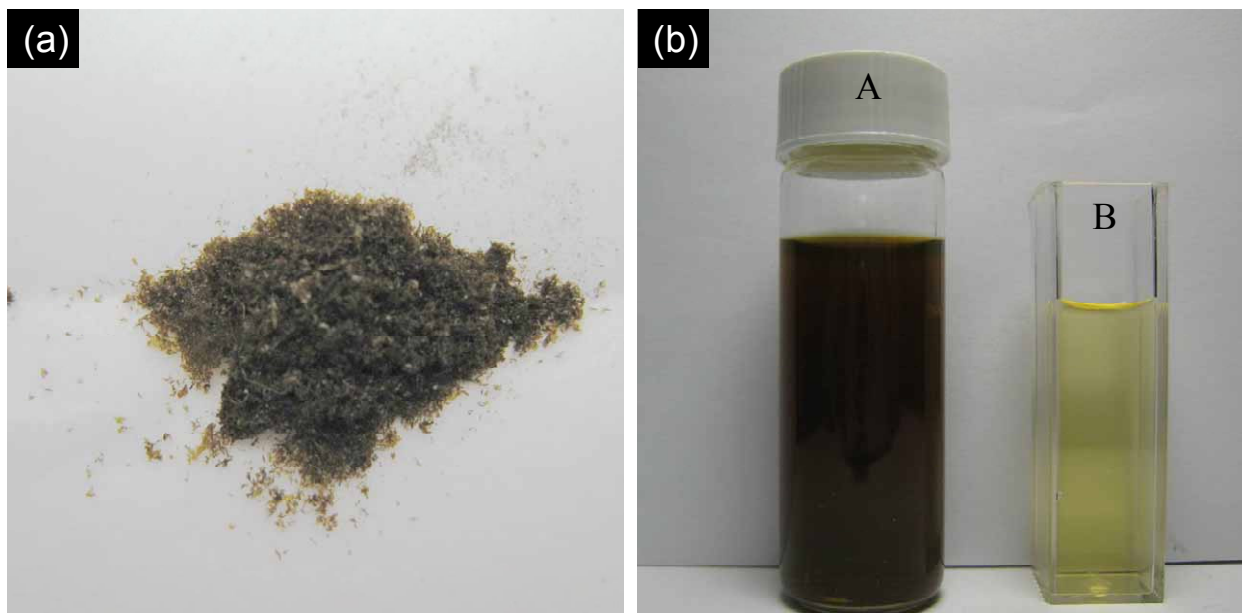

Figure S2. Photographical images of (a) powder of AgNP/clay after removing water, (b) powder dispersed in water at the concentration of 250 ppm (A) and 10 ppm (B).
